# Supplementary material
Source: publisher figshare collection journal article supplement (https://tandf.figshare.com/ndownloader/files/17927960)
Supplement: Supplementary file 1 [file 17927960]

| **Supplementary table 1. Comparison of characteristics of HCC patients with AFP alone positive with those with US positive** | | | |
| --- | --- | --- | --- |
| Variables | AFP alone positive (n=23) | US positive (n=36) | *P*-value |
| Age (years) | 55.7 ± 8.1 | 56.7 ± 8.6 | 0.720 |
| Male gender | 15 (65.2) | 28 (77.8) | 0.371 |
| Etiology, n (%) |  |  | 0.732 |
| Hepatitis B virus | 20 (87.0) | 30 (83.3) |  |
| Hepatitis C virus | 1 (4.3) | 2 (5.6) |  |
| Alcoholic | 1 (4.3) | 2 (5.6) |  |
| unknown | 1 (4.3) | 2 (5.6) |  |
| Child Pugh score |  |  | 1.000 |
| Child-Pugh A, n (%) | 22 (95.7) | 35 (97.2) |  |
| Child-Pugh B, n (%) | 1 (4.3) | 1 (2.8) |  |
| Alpha-fetoprotein, ng/mL | 11.2 ± 11.9 | 9.8 ± 10.4 | 0.792 |
| Aspartate aminotransferase (IU/L) | 40.1 ± 10.0 | 45.6 ± 27.2 | 0.762 |
| Alanine aminotransferase (IU/L) | 41.8 ± 22.4 | 44.1 ± 22.5 | 0.641 |
| Serum albumin (g/dL) | 4.1 ± 0.5 | 4.3 ± 0.3 | 0.070 |
| Total bilirubin (mg/dL) | 1.3 ± 0.6 | 1.0 ± 0.4 | 0.081 |
| Platelet count (109/L) | 121.2± 46.8 | 115.4 ± 44.1 | 0.632 |
| **BCLC stage, n (%)** |  |  | 0.922 |
| Very early (0) | 3 (13.0) | 10 (27.8) |  |
| Early (A) | 17 (73.9) | 18 (50.0) |  |
| Intermediate (B) | 1 (4.3) | 3 (8.3) |  |
| Advenced (C) | 2 (8.7) | 4 (11.1) |  |
| Terminal (D) | 0 (0) | 1 (2.8) |  |
| **Maximum tumor diameter, cm** | 2.5 ± 1.8 | 3.4 ± 2.8 | 0.042 |
| ≤2.0 | 14 (60.9) | 14 (38.9) |  |
| 2.1~5.0 | 6 (26.1) | 17 (47.2) |  |
| ＞5.0 | 3 (13.0) | 5 (13.9) | 0.228 |
| **Portal vein invasion, n (%)** | 2 (8.7) | 3 (8.3) | 1.000 |
| Variables are expressed as mean ± standard deviation or n (%). |  |  |  |
|  | |  |  |

| **Supplementary table 2. Performance characteristics of HCC surveillance tests in chronic hepatitis B patients with viral suppression by antiviral therapy** | | | | |
| --- | --- | --- | --- | --- |
| Test | Sensitivity (%) (95% CI) | Specificity (%) (95% CI) | PPV (%) (95% CI) | NPV (%) (95% CI) |
| Ultrasound | 44.4 (0.120-0.769) | 100 (NA) | 100 (NA) | 88.9 (0.797-0.981) |
| AFP | 22.2 (0-0.494) | 97.5 (0.930-1) | 66.7 (0.133-1) | 84.8 (0.744-0.952) |
| Ultrasound or AFP | 66.7 (0.359-0.975) | 97.5 (0.928-1) | 85.7 (0.598-1) | 92.9 (0.851-1) |
| HCC, hepatocellular carcinoma; CI, confidence interval; PPV, positive predictive value; NPV, negative predictive value; NA, nonapplicable; AFP, alpha-fetoprotein. | | | | |
